# Supplementary material for: Gaps in tropical science from unrepresentative distribution of sampling and citation across natural terrestrial environments
Source: Nat Commun. 2025 Dec 20;16:11378. doi: 10.1038/s41467-025-67617-4 (PMC12727867; doi:10.1038/s41467-025-67617-4)
Supplement: Supplementary file 3 — Supplementary Dataset 1 [file 41467_2025_67617_MOESM3_ESM.xlsx]

## Sheet: Sheet1
Biome	Ecoregion	Area	Sampling locations	Sampling locations	Citations	Citations	Sampling:citation ratio
		% of total	% of total	Density per 105 km2	% of total	Density per 105 km2
Coniferous Forests	Central American pine-oak forests	0.229241	0.282575	16.2248	0.143075	115.382	0.506325
Coniferous Forests	Himalayan subtropical pine forests	0.1573	0.298273	24.9588	0.0543953	63.9295	0.182368
Coniferous Forests	Hispaniolan pine forests	0.0238868	0.753532	415.223	0.0300687	232.715	0.0399036
Coniferous Forests	Sierra Madre del Sur pine-oak forests	0.125991	0.0941915	9.84034	0.0277565	40.7281	0.294682
Coniferous Forests	Sierra Madre Occidental pine-oak forests	0.447245	0.0784929	2.31006	0.109376	45.2111	1.39345
Coniferous Forests	Sierra Madre Oriental pine-oak forests	0.134708	0.0156986	1.53393	0.00204914	2.8122	0.13053
Coniferous Forests	Trans-Mexican Volcanic Belt pine-oak forests	0.190155	0.345369	23.9064	0.279005	271.252	0.807847
Deserts & Xeric Shrublands	Aravalli west thorn scrub forests	1.0074	0.125589	1.64091	0.0422868	7.76013	0.336709
Deserts & Xeric Shrublands	Araya and Paria xeric scrub	0.0108692	0.0156986	19.0108	0.0190011	323.184	1.21037
Deserts & Xeric Shrublands	Caribbean shrublands	0.00644274	0.0627943	128.288	0.11382	3266.01	1.81259
Deserts & Xeric Shrublands	Central Mexican matorral	0.122316	0.0784929	8.4467	0.0843873	127.545	1.07509
Deserts & Xeric Shrublands	Chihuahuan desert	1.03708	0.0470958	0.597733	0.097241	17.3342	2.06475
Deserts & Xeric Shrublands	Deccan thorn scrub forests	0.700625	0.125589	2.35941	0.0688206	18.1594	0.547984
Deserts & Xeric Shrublands	Djibouti xeric shrublands	0.489142	0.0313972	0.844876	0.0222797	8.4206	0.70961
Deserts & Xeric Shrublands	Godavari-Krishna mangroves	0.0144226	0.156986	143.27	0.0317989	407.604	0.202559
Deserts & Xeric Shrublands	Guajira-Barranquilla xeric scrub	0.0650425	0.0941915	19.0613	0.0422779	120.167	0.448851
Deserts & Xeric Shrublands	Gulf of California xeric scrub	0.0486345	0.0156986	4.24868	0.00866227	32.9273	0.551787
Deserts & Xeric Shrublands	La Costa xeric shrublands	0.140885	0.141287	13.2001	0.263207	345.383	1.86292
Deserts & Xeric Shrublands	Madagascar spiny thickets	0.0894598	0.0313972	4.61956	0.0602533	124.515	1.91907
Deserts & Xeric Shrublands	Meseta Central matorral	0.258239	0.0313972	1.60032	0.131411	94.0759	4.18544
Deserts & Xeric Shrublands	Motagua Valley thornscrub	0.00481126	0.0156986	42.9477	0.00204914	78.7375	0.13053
Deserts & Xeric Shrublands	Namibian savanna woodlands	0.212404	0.0156986	0.972829	0.0592388	51.5599	3.77351
Deserts & Xeric Shrublands	Sechura desert	0.380644	0.0470958	1.62855	0.103249	50.1457	2.19231
Deserts & Xeric Shrublands	Sonoran desert	0.463861	0.0313972	0.890923	0.0380022	15.1457	1.21037
Deserts & Xeric Shrublands	Tehuacán Valley matorral	0.0203776	0.0627943	40.5606	0.149773	1358.78	2.38514
Dry Broadleaf Forests	Bajío dry forests	0.0772469	0.0156986	2.67496	0.0111771	26.7496	0.711983
Dry Broadleaf Forests	Balsas dry forests	0.128622	0.125589	12.8521	0.117536	168.938	0.935883
Dry Broadleaf Forests	Bolivian montane dry forests	0.150386	0.0313972	2.74802	0.0406102	49.9224	1.29344
Dry Broadleaf Forests	Brazilian Atlantic dry forests	0.236925	0.0470958	2.61643	0.0352223	27.4837	0.747886
Dry Broadleaf Forests	Caatinga	1.51114	2.59027	22.5619	0.828103	101.309	0.319698
Dry Broadleaf Forests	Cauca Valley dry forests	0.0151106	0.0470958	41.024	0.00521599	63.8151	0.110753
Dry Broadleaf Forests	Central American dry forests	0.140041	0.737834	69.349	0.919108	1213.33	1.24568
Dry Broadleaf Forests	Central Deccan Plateau dry deciduous forests	0.4947	0.282575	7.51846	0.231925	86.6712	0.820758
Dry Broadleaf Forests	Central Indochina dry forests	0.659027	0.313972	6.27083	0.365753	102.601	1.16492
Dry Broadleaf Forests	Chhota-Nagpur dry deciduous forests	0.252369	0.863422	45.0324	0.863808	632.775	1.00045
Dry Broadleaf Forests	Chiapas Depression dry forests	0.0288741	0.0156986	7.15634	0.0106477	68.1735	0.678257
Dry Broadleaf Forests	Chiquitano dry forests	0.474771	0.156986	4.35225	0.338456	131.791	2.15597
Dry Broadleaf Forests	Cuban dry forests	0.13585	0.0156986	1.52104	0.0257074	34.9839	1.63756
Dry Broadleaf Forests	East Deccan dry-evergreen forests	0.0525508	0.266876	66.8449	0.402526	1416.06	1.50829
Dry Broadleaf Forests	Fiji tropical dry forests	0.0142366	0.0941915	87.085	0.21013	2728.66	2.23088
Dry Broadleaf Forests	Hawai'i tropical dry forests	0.0136676	0.282575	272.132	0.490235	6631.03	1.73489
Dry Broadleaf Forests	Hispaniolan dry forests	0.0319161	0.0627943	25.8969	0.0257074	148.907	0.40939
Dry Broadleaf Forests	Jalisco dry forests	0.0538281	0.659341	161.227	1.06608	3661.41	1.61689
Dry Broadleaf Forests	Khathiar-Gir dry deciduous forests	0.55044	0.251177	6.00632	0.200802	67.4414	0.799443
Dry Broadleaf Forests	Madagascar dry deciduous forests	0.313172	0.0156986	0.659805	0.0167657	9.89708	1.06797
Dry Broadleaf Forests	Magdalena Valley dry forests	0.040394	0.0627943	20.4617	0.0235252	107.667	0.374639
Dry Broadleaf Forests	Maracaibo dry forests	0.0621646	0.0156986	3.32396	0.0223543	66.4791	1.42397
Dry Broadleaf Forests	Maranhão Babaçu forests	0.292664	0.0784929	3.5302	0.0721856	45.5984	0.919645
Dry Broadleaf Forests	Marianas tropical dry forests	0.0021327	0.0156986	96.8876	0.00058827	50.9935	0.0374728
Dry Broadleaf Forests	Narmada Valley dry deciduous forests	0.350153	0.156986	5.9012	0.0966821	51.0454	0.615865
Dry Broadleaf Forests	New Caledonia dry forests	0.00910907	0.0156986	22.6842	0.015648	317.579	0.996776
Dry Broadleaf Forests	North Deccan dry deciduous forests	0.120165	0.0156986	1.71957	0.0558856	85.9784	3.55991
Dry Broadleaf Forests	Patía valley dry forests	0.00467109	0.0156986	44.2364	0.00447085	176.946	0.284793
Dry Broadleaf Forests	Puerto Rican dry forests	0.00262689	0.10989	550.624	0.161853	11390.7	1.47287
Dry Broadleaf Forests	Sierra de la Laguna dry forests	0.00821374	0.0313972	50.3139	0.0262957	591.85	0.837517
Dry Broadleaf Forests	Sinaloan dry forests	0.159856	0.156986	12.9262	0.106351	122.993	0.677454
Dry Broadleaf Forests	Sinú Valley dry forests	0.0514086	0.0156986	4.01941	0.0134126	48.2329	0.854379
Dry Broadleaf Forests	Sonoran-Sinaloan subtropical dry forest	0.105181	0.0784929	9.8227	0.164304	288.787	2.09323
Dry Broadleaf Forests	South Deccan Plateau dry deciduous forests	0.169285	0.282575	21.9712	0.302602	330.463	1.07088
Dry Broadleaf Forests	Southeast Indochina dry evergreen forests	0.255778	0.266876	13.7336	0.31113	224.878	1.16582
Dry Broadleaf Forests	Southern Pacific dry forests	0.0873675	0.235479	35.4764	0.0464439	98.2759	0.197232
Dry Broadleaf Forests	Southern Vietnam lowland dry forests	0.0721248	0.0627943	11.4597	0.0683668	175.238	1.08874
Dry Broadleaf Forests	Sri Lanka dry-zone dry evergreen forests	0.0996232	0.0313972	4.14828	0.00447085	8.29655	0.142397
Dry Broadleaf Forests	Timor and Wetar deciduous forests	0.0689781	0.0156986	2.99562	0.00447085	11.9825	0.284793
Dry Broadleaf Forests	Trinidad and Tobago dry forest	0.000558715	0.0627943	1479.34	0.00231526	766.087	0.0368705
Dry Broadleaf Forests	Tumbes-Piura dry forests	0.0849263	0.0156986	2.43308	0.00558856	12.1654	0.355991
Dry Broadleaf Forests	Veracruz dry forests	0.0136701	0.204082	196.503	0.10758	1454.88	0.527141
Dry Broadleaf Forests	Yap tropical dry forests	0.000209634	0.0156986	985.684	0.0536502	47312.8	3.41752
Dry Broadleaf Forests	Yucatán dry forests	0.102538	0.235479	30.2278	0.184079	331.887	0.781724
Flooded Grasslands & Savannas	Pantanal	0.352311	0.423862	15.8357	0.193093	101.323	0.455556
Flooded Grasslands & Savannas	Paraná flooded savanna	0.0766409	0.0470958	8.08833	0.0180257	43.4809	0.382745
Flooded Grasslands & Savannas	Southern Cone Mesopotamian savanna	0.0555126	0.0313972	7.44453	0.0306863	102.193	0.977358
Flooded Grasslands & Savannas	Zambezian flooded grasslands	0.417265	0.204082	6.43769	0.124103	54.9845	0.608106
Grasslands, Savannas & Shrublands	Arnhem Land tropical savanna	0.326679	1.74254	70.2102	1.80844	1023.41	1.03782
Grasslands, Savannas & Shrublands	Beni savanna	0.259508	0.0470958	2.38874	0.084201	59.984	1.78787
Grasslands, Savannas & Shrublands	Brigalow tropical savanna	0.845009	0.408163	6.35785	0.45171	98.825	1.10669
Grasslands, Savannas & Shrublands	Campos Rupestres montane savanna	0.0543711	0.0470958	11.4012	0.0357668	121.613	0.759448
Grasslands, Savannas & Shrublands	Cape York Peninsula tropical savanna	0.253258	0.141287	7.34307	0.144962	105.818	1.02601
Grasslands, Savannas & Shrublands	Carpentaria tropical savanna	0.756305	0.43956	7.64997	0.162562	39.7366	0.369828
Grasslands, Savannas & Shrublands	Central bushveld	0.321691	0.0627943	2.56933	0.163335	93.8662	2.60111
Grasslands, Savannas & Shrublands	Central Zambezian wet miombo woodlands	2.10322	0.345369	2.16141	0.239241	21.0291	0.692712
Grasslands, Savannas & Shrublands	Cerrado	3.94676	3.24961	10.8375	2.08353	97.595	0.641164
Grasslands, Savannas & Shrublands	Drakensberg Escarpment savanna and thicket	0.072256	0.0156986	2.85973	0.00558856	14.2986	0.355991
Grasslands, Savannas & Shrublands	Dry Chaco	1.62576	0.392465	3.17747	0.278728	31.6951	0.710198
Grasslands, Savannas & Shrublands	Dry miombo woodlands	2.4499	0.266876	1.43383	0.343923	25.9526	1.2887
Grasslands, Savannas & Shrublands	East Sudanian savanna	2.1807	0.0941915	0.568531	0.228659	19.3848	2.42759
Grasslands, Savannas & Shrublands	Einasleigh upland savanna	0.240225	0.235479	12.9024	0.216033	166.253	0.91742
Grasslands, Savannas & Shrublands	Guianan savanna	0.215923	0.0470958	2.87092	0.0640822	54.8665	1.36068
Grasslands, Savannas & Shrublands	Guinean forest-savanna	1.38607	0.282575	2.6834	0.206255	27.5098	0.729914
Grasslands, Savannas & Shrublands	Hawai'i tropical high shrublands	0.00381772	0.0313972	108.249	0.129655	6278.45	4.1295
Grasslands, Savannas & Shrublands	Humid Chaco	0.60253	0.0627943	1.37176	0.034091	10.4599	0.542899
Grasslands, Savannas & Shrublands	Kalahari Acacia woodlands	0.21988	0.0156986	0.93975	0.00230994	1.94215	0.147143
Grasslands, Savannas & Shrublands	Kimberly tropical savanna	0.699451	0.235479	4.43131	0.378718	100.098	1.60829
Grasslands, Savannas & Shrublands	Limpopo lowveld	0.169506	0.204082	15.8473	0.115309	125.76	0.565012
Grasslands, Savannas & Shrublands	Llanos	0.776497	0.251177	4.25774	0.624801	148.755	2.48749
Grasslands, Savannas & Shrublands	Mitchell Grass Downs	0.975059	0.0784929	1.05959	0.116176	22.0268	1.48008
Grasslands, Savannas & Shrublands	Northern Acacia-Commiphora bushlands and thickets	0.753823	0.266876	4.65992	0.216349	53.0584	0.810673
Grasslands, Savannas & Shrublands	Northern Congolian Forest-Savanna	1.45267	0.0313972	0.284486	0.0089417	1.13794	0.284793
Grasslands, Savannas & Shrublands	Sahelian Acacia savanna	7.5818	0.141287	0.245284	0.0970175	2.36563	0.686668
Grasslands, Savannas & Shrublands	Southern Acacia-Commiphora bushlands and thickets	0.483268	0.188383	5.13088	0.208453	79.7424	1.10654
Grasslands, Savannas & Shrublands	Terai-Duar savanna and grasslands	0.0713263	0.21978	40.558	0.173891	450.708	0.791202
Grasslands, Savannas & Shrublands	Uruguayan savanna	0.728372	0.251177	4.53905	0.202991	51.5219	0.808159
Grasslands, Savannas & Shrublands	Victoria Basin forest-savanna	0.342852	0.43956	16.8753	0.661123	356.488	1.50405
Grasslands, Savannas & Shrublands	Victoria Plains tropical savanna	0.46282	0.0627943	1.78585	0.171904	68.6661	2.73757
Grasslands, Savannas & Shrublands	West Sudanian savanna	3.37425	0.423862	1.65343	0.410341	22.482	0.968101
Grasslands, Savannas & Shrublands	Western Congolian forest-savanna	0.772637	0.125589	2.1395	0.0683401	16.3519	0.544158
Grasslands, Savannas & Shrublands	Western Gulf coastal grasslands	0.187487	0.172684	12.1232	0.367867	362.733	2.13029
Grasslands, Savannas & Shrublands	Zambezian Baikiaea woodlands	0.740878	0.0627943	1.11561	0.0470184	11.7325	0.748769
Grasslands, Savannas & Shrublands	Zambezian mopane woodlands	0.800899	0.0941915	1.548	0.0739181	17.0624	0.784763
Grasslands, Savannas & Shrublands	Zambezian-Limpopo mixed woodlands	0.376968	0.0470958	1.64443	0.0417738	20.4865	0.886997
Mangroves	Amazon-Orinoco-Southern Caribbean mangroves	0.084501	0.156986	24.4533	0.306945	671.533	1.95524
Mangroves	Bahamian-Antillean mangroves	0.0452661	0.0941915	27.389	0.21606	882.408	2.29384
Mangroves	Central African mangroves	0.0636161	0.0784929	16.2406	0.027384	79.5788	0.348872
Mangroves	Guinean mangroves	0.0483946	0.0156986	4.26974	0.000272613	1.0414	0.0173654
Mangroves	Indochina mangroves	0.0552993	0.141287	33.6296	0.144837	484.203	1.02512
Mangroves	Mesoamerican Gulf-Caribbean mangroves	0.0550849	0.392465	93.779	0.228588	767.164	0.582441
Mangroves	Northern Mesoamerican Pacific mangroves	0.0168903	0.0941915	73.4027	0.0988377	1081.82	1.04933
Mangroves	South American Pacific mangroves	0.0278146	0.0470958	22.2868	0.0949196	630.886	2.01546
Mangroves	Southern Atlantic Brazilian mangroves	0.0207155	0.612245	389.017	0.540206	4820.95	0.882337
Mangroves	Southern Mesoamerican Pacific mangroves	0.0161722	0.0784929	63.8852	0.0135142	154.486	0.17217
Mangroves	Sunda Shelf mangroves	0.0770322	0.0941915	16.0945	0.0550473	132.109	0.584419
Mangroves	Sundarbans mangroves	0.0421179	0.282575	88.3089	0.133857	587.549	0.473706
Moist Broadleaf Forests	Albertine Rift montane forests	0.310978	0.580848	24.585	0.225685	134.166	0.388545
Moist Broadleaf Forests	Alto Paraná Atlantic forests	0.997783	2.93564	38.7261	1.05366	195.223	0.35892
Moist Broadleaf Forests	Andaman Islands rain forests	0.011769	0.0156986	17.5574	0.0324137	509.164	2.06475
Moist Broadleaf Forests	Araucaria moist forests	0.445651	0.596546	17.6192	0.603878	250.509	1.01229
Moist Broadleaf Forests	Atlantic Coast restingas	0.0162214	0.816327	662.391	0.377039	4297.02	0.461873
Moist Broadleaf Forests	Bahia coastal forests	0.22586	0.518053	30.1907	0.382034	312.703	0.737442
Moist Broadleaf Forests	Bahia interior forests	0.473687	0.832025	23.1197	0.518577	202.39	0.623271
Moist Broadleaf Forests	Bolivian Yungas	0.186443	0.0784929	5.54144	0.0337425	33.458	0.429879
Moist Broadleaf Forests	Borneo lowland rain forests	0.879391	2.44898	36.6556	3.35646	705.616	1.37056
Moist Broadleaf Forests	Borneo montane rain forests	0.245483	0.706436	37.8782	0.735523	553.914	1.04117
Moist Broadleaf Forests	Borneo peat swamp forests	0.138798	0.612245	58.0603	1.051	1399.87	1.71664
Moist Broadleaf Forests	Brahmaputra Valley semi-evergreen forests	0.116981	0.10989	12.3646	0.238073	376.238	2.16646
Moist Broadleaf Forests	Caatinga Enclaves moist forests	0.00986931	0.0156986	20.9369	0.0201188	376.863	1.28157
Moist Broadleaf Forests	Cameroon Highlands forests	0.0782717	0.0313972	5.27987	0.0402377	95.0377	1.28157
Moist Broadleaf Forests	Caqueta moist forests	0.378878	0.0156986	0.54538	0.0111771	5.4538	0.711983
Moist Broadleaf Forests	Cardamom Mountains rain forests	0.0910718	0.0470958	6.80668	0.00278065	5.64457	0.0590425
Moist Broadleaf Forests	Carolines tropical moist forests	0.00119384	0.0156986	173.082	0.00058827	91.0956	0.0374728
Moist Broadleaf Forests	Catatumbo moist forests	0.0470146	0.0156986	4.39507	0.00447085	17.5803	0.284793
Moist Broadleaf Forests	Cauca Valley montane forests	0.0659473	0.10989	21.9331	0.0948104	265.783	0.862775
Moist Broadleaf Forests	Central American Atlantic moist forests	0.184832	0.0313972	2.23589	0.019345	19.349	0.616139
Moist Broadleaf Forests	Central American montane forests	0.0273811	0.141287	67.9189	0.0720495	486.462	0.50995
Moist Broadleaf Forests	Central Congolian lowland forests	0.853148	0.0313972	0.4844	0.086809	18.8109	2.76487
Moist Broadleaf Forests	Central Range Papuan montane rain forests	0.353816	0.0470958	1.75203	0.0175108	9.14951	0.371813
Moist Broadleaf Forests	Chao Phraya freshwater swamp forests	0.0802938	0.0784929	12.8673	0.232963	536.381	2.96795
Moist Broadleaf Forests	Chao Phraya lowland moist deciduous forests	0.0420231	0.0313972	9.83424	0.00870219	38.2833	0.277165
Moist Broadleaf Forests	Chiapas montane forests	0.0118998	0.0156986	17.3643	0.0268251	416.743	1.70876
Moist Broadleaf Forests	Chocó-Darién moist forests	0.151472	0.125589	10.9133	0.0663135	80.9353	0.528021
Moist Broadleaf Forests	Comoros forests	0.00424717	0.172684	535.17	0.0568437	2474.29	0.329177
Moist Broadleaf Forests	Congolian coastal forests	0.390166	0.141287	4.76641	0.164734	78.0552	1.16595
Moist Broadleaf Forests	Costa Rican seasonal moist forests	0.0220135	0.235479	140.799	0.791614	6648.03	3.36172
Moist Broadleaf Forests	Cross-Niger transition forests	0.0426254	0.141287	43.6287	0.049347	214.023	0.349267
Moist Broadleaf Forests	Cross-Sanaga-Bioko coastal forests	0.107117	0.0941915	11.5742	0.088142	152.122	0.935774
Moist Broadleaf Forests	East African montane forests	0.127044	0.455259	47.1674	0.688829	1002.36	1.51305
Moist Broadleaf Forests	East Deccan moist deciduous forests	0.702903	0.423862	7.93719	0.311435	81.9108	0.734757
Moist Broadleaf Forests	Eastern Arc forests	0.023041	0.141287	80.7121	0.502541	4032.16	3.55687
Moist Broadleaf Forests	Eastern Congolian swamp forests	0.190753	0.0313972	2.16649	0.0126674	12.2768	0.403457
Moist Broadleaf Forests	Eastern Cordillera Real montane forests	0.210894	1.0989	68.5855	1.20962	1060.36	1.10075
Moist Broadleaf Forests	Eastern Guinean forests	0.390317	0.659341	22.2347	0.862254	408.401	1.30775
Moist Broadleaf Forests	Eastern Java-Bali montane rain forests	0.0327085	0.125589	50.5391	0.0120154	67.9119	0.0956727
Moist Broadleaf Forests	Eastern Java-Bali rain forests	0.110892	0.0313972	3.72674	0.0164863	27.4847	0.525087
Moist Broadleaf Forests	Ethiopian montane forests	0.139814	0.0313972	2.95583	0.00362575	4.7942	0.11548
Moist Broadleaf Forests	Fiji tropical moist forests	0.023911	0.0313972	17.2834	0.0346491	267.893	1.10357
Moist Broadleaf Forests	Greater Negros-Panay rain forests	0.0720236	0.0470958	8.60686	0.101712	261.075	2.15968
Moist Broadleaf Forests	Guianan lowland moist forests	0.983887	0.973312	13.021	1.1595	217.868	1.19129
Moist Broadleaf Forests	Guianan piedmont moist forests	0.474915	0.0470958	1.30528	0.102457	39.8835	2.1755
Moist Broadleaf Forests	Guizhou Plateau broadleaf and mixed forests	0.556114	0.659341	15.6057	0.306076	101.75	0.464215
Moist Broadleaf Forests	Hainan Island monsoon rain forests	0.0320049	0.345369	142.038	0.315977	1825.19	0.914898
Moist Broadleaf Forests	Hawai'i tropical moist forests	0.0138806	0.847724	803.866	0.961621	12807.5	1.13436
Moist Broadleaf Forests	Himalayan subtropical broadleaf forests	0.078777	0.0627943	10.492	0.0443359	104.046	0.70605
Moist Broadleaf Forests	Hispaniolan moist forests	0.0946656	0.10989	15.2793	0.017993	35.1382	0.163736
Moist Broadleaf Forests	Iquitos várzea	0.236607	0.21978	12.2264	0.10422	81.4317	0.474203
Moist Broadleaf Forests	Isthmian-Atlantic moist forests	0.120588	3.09262	337.566	6.96265	10674.2	2.25138
Moist Broadleaf Forests	Isthmian-Pacific moist forests	0.060287	0.502355	109.679	1.56331	4793.9	3.11196
Moist Broadleaf Forests	Jamaican moist forests	0.0170876	0.0627943	48.3702	0.168775	1825.97	2.68774
Moist Broadleaf Forests	Japurá-Solimões-Negro moist forests	0.554693	0.408163	9.68543	0.976812	325.557	2.39319
Moist Broadleaf Forests	Jian Nan subtropical evergreen forests	1.36851	3.43799	33.0669	4.43765	599.477	1.29077
Moist Broadleaf Forests	Juruá-Purus moist forests	0.499002	0.0156986	0.414091	0.023472	8.69591	1.49516
Moist Broadleaf Forests	Kayah-Karen montane rain forests	0.24622	0.172684	9.23142	0.575156	431.849	3.33068
Moist Broadleaf Forests	Kwazulu Natal-Cape coastal forests	0.0226843	0.0313972	18.2181	0.0570033	464.561	1.81556
Moist Broadleaf Forests	Leeward Islands moist forests	0.00203832	0.0470958	304.122	0.0488068	4426.66	1.03633
Moist Broadleaf Forests	Lower Gangetic Plains moist deciduous forests	0.523839	3.84615	96.6422	0.424254	149.726	0.110306
Moist Broadleaf Forests	Luang Prabang montane rain forests	0.147918	0.0313972	2.79388	0.0447085	55.8776	1.42397
Moist Broadleaf Forests	Luzon montane rain forests	0.0170943	0.0156986	12.0878	0.0032733	35.4	0.208509
Moist Broadleaf Forests	Luzon rain forests	0.196046	0.282575	18.972	0.134349	126.691	0.475446
Moist Broadleaf Forests	Madagascar humid forests	0.23093	0.251177	14.3166	0.53205	425.933	2.11823
Moist Broadleaf Forests	Madagascar subhumid forests	0.411141	0.0470958	1.50775	0.166436	74.8385	3.53399
Moist Broadleaf Forests	Madeira-Tapajós moist forests	1.4809	1.20879	10.744	1.10731	138.234	0.916051
Moist Broadleaf Forests	Magdalena Valley montane forests	0.216134	0.643642	39.1976	0.23191	198.365	0.360309
Moist Broadleaf Forests	Magdalena-Urabá moist forests	0.15795	0.141287	11.7739	0.0791003	92.5822	0.559855
Moist Broadleaf Forests	Malabar Coast moist forests	0.0730047	2.15071	387.765	0.87258	2209.65	0.405718
Moist Broadleaf Forests	Maputaland coastal forests and woodlands	0.0622875	0.0313972	6.6348	0.0201188	59.7132	0.640785
Moist Broadleaf Forests	Marajó várzea	0.182467	0.0313972	2.26488	0.0547679	55.4895	1.74436
Moist Broadleaf Forests	Mascarene forests	0.0101908	0.188383	243.317	0.0873679	1584.94	0.463778
Moist Broadleaf Forests	Mato Grosso tropical dry forests	0.851974	0.470958	7.27601	0.698603	151.591	1.48337
Moist Broadleaf Forests	Meghalaya subtropical forests	0.0860194	0.0627943	9.60864	0.0424731	91.282	0.676384
Moist Broadleaf Forests	Mindanao montane rain forests	0.0374423	0.0156986	5.51869	0.0032733	16.1619	0.208509
Moist Broadleaf Forests	Mindanao-Eastern Visayas rain forests	0.216275	0.0627943	3.82166	0.0736094	62.9209	1.17223
Moist Broadleaf Forests	Mizoram-Manipur-Kachin rain forests	0.279461	0.0627943	2.95759	0.0170383	11.2713	0.271335
Moist Broadleaf Forests	Monte Alegre várzea	0.137423	0.10989	10.5253	0.158299	212.954	1.44052
Moist Broadleaf Forests	Myanmar coastal rain forests	0.137066	0.0156986	1.50753	0.0167657	22.613	1.06797
Moist Broadleaf Forests	Nansei Islands subtropical evergreen forests	0.0083967	0.0470958	73.8263	0.0663176	1460.12	1.40814
Moist Broadleaf Forests	Napo moist forests	0.517802	0.125589	3.19245	0.0748208	26.7133	0.595761
Moist Broadleaf Forests	Negro-Branco moist forests	0.41519	0.0784929	2.4884	0.140575	62.5933	1.79092
Moist Broadleaf Forests	New Britain-New Ireland lowland rain forests	0.0721468	0.894819	163.251	0.00650098	16.6583	0.00726513
Moist Broadleaf Forests	New Caledonia rain forests	0.0300088	0.251177	110.172	0.127579	785.958	0.507924
Moist Broadleaf Forests	Niger Delta swamp forests	0.0296377	0.125589	55.7755	0.0566121	353.129	0.450774
Moist Broadleaf Forests	Nigerian lowland forests	0.138533	0.455259	43.2556	0.0980234	130.811	0.215313
Moist Broadleaf Forests	North Western Ghats moist deciduous forests	0.0992736	0.141287	18.733	0.0487966	90.8708	0.345372
Moist Broadleaf Forests	North Western Ghats montane rain forests	0.0636937	0.533752	110.301	0.0788289	228.801	0.147688
Moist Broadleaf Forests	Northeast Brazil restingas	0.0206858	0.0627943	39.9564	0.212254	1896.93	3.38014
Moist Broadleaf Forests	Northeast Congolian lowland forests	1.05859	0.0470958	0.58559	0.143905	25.1316	3.05559
Moist Broadleaf Forests	Northern Annamites rain forests	0.0972258	0.0470958	6.37585	0.0435908	82.886	0.925578
Moist Broadleaf Forests	Northern Indochina subtropical forests	0.900648	1.1146	16.2893	1.81375	372.298	1.62727
Moist Broadleaf Forests	Northern Khorat Plateau moist deciduous forests	0.0347025	0.10989	41.6808	0.0204666	109.032	0.186246
Moist Broadleaf Forests	Northern New Guinea lowland rain and freshwater swamp forests	0.278202	0.455259	21.5395	0.0559872	37.2046	0.122979
Moist Broadleaf Forests	Northern New Guinea montane rain forests	0.047905	0.0784929	21.5669	0.00965297	37.2519	0.122979
Moist Broadleaf Forests	Northern Swahili coastal forests	0.296363	0.0941915	4.18337	0.0216091	13.4797	0.229417
Moist Broadleaf Forests	Northern Thailand-Laos moist deciduous forests	0.0868065	0.0313972	4.76076	0.0551405	117.432	1.75622
Moist Broadleaf Forests	Northern Vietnam lowland rain forests	0.0465376	0.0627943	17.7605	0.0129045	51.2631	0.205504
Moist Broadleaf Forests	Northwest Andean montane forests	0.166972	0.156986	12.3753	0.202439	224.141	1.28954
Moist Broadleaf Forests	Northwest Congolian lowland forests	0.893044	0.596546	8.79243	0.526403	108.972	0.882417
Moist Broadleaf Forests	Oaxacan montane forests	0.0156564	0.156986	131.98	0.452394	5341.88	2.88175
Moist Broadleaf Forests	Orissa semi-evergreen forests	0.04593	0.0156986	4.49886	0.0167657	67.4829	1.06797
Moist Broadleaf Forests	Pantanos de Centla	0.035443	0.156986	58.2999	0.0909818	474.561	0.579554
Moist Broadleaf Forests	Pantepui forests & shrublands	0.104711	0.0313972	3.9467	0.0160205	28.2847	0.510254
Moist Broadleaf Forests	Peninsular Malaysian montane rain forests	0.035329	0.10989	40.9417	0.120992	633.134	1.10103
Moist Broadleaf Forests	Peninsular Malaysian peat swamp forests	0.00745969	0.0784929	138.499	0.135243	3351.68	1.723
Moist Broadleaf Forests	Peninsular Malaysian rain forests	0.258175	3.3281	169.676	2.35344	1685.22	0.707143
Moist Broadleaf Forests	Pernambuco coastal forests	0.0361641	0.0313972	11.4275	0.000745142	3.80917	0.0237328
Moist Broadleaf Forests	Pernambuco interior forests	0.0466929	0.0627943	17.7014	0.0142821	56.5471	0.227443
Moist Broadleaf Forests	Peruvian Yungas	0.384257	0.580848	19.8966	0.838557	403.44	1.44368
Moist Broadleaf Forests	Petén-Veracruz moist forests	0.307047	0.737834	31.6294	0.629554	379.05	0.853246
Moist Broadleaf Forests	Puerto Rican moist forests	0.0155059	1.36578	1159.36	3.98587	47521.8	2.91839
Moist Broadleaf Forests	Purus várzea	0.365244	0.0941915	3.39443	0.126845	64.2034	1.34667
Moist Broadleaf Forests	Purus-Madeira moist forests	0.358014	0.0156986	0.577163	0.000372571	0.192388	0.0237328
Moist Broadleaf Forests	Queensland tropical rain forests	0.0713567	1.58556	292.473	2.36519	6127.74	1.49171
Moist Broadleaf Forests	Red River freshwater swamp forests	0.0221594	0.565149	335.693	0.0378013	315.367	0.0668872
Moist Broadleaf Forests	Rio Negro campinarana	0.198338	0.0313972	2.08363	0.00606758	5.65558	0.193253
Moist Broadleaf Forests	Seram rain forests	0.0398302	0.0313972	10.3757	0.185884	862.776	5.92041
Moist Broadleaf Forests	Serra do Mar coastal forests	0.216157	3.56358	216.997	1.22206	1045.18	0.342929
Moist Broadleaf Forests	Sierra de los Tuxtlas	0.00803832	0.313972	514.118	0.58156	13375.1	1.85227
Moist Broadleaf Forests	Sierra Madre de Chiapas moist forests	0.0231797	0.0156986	8.91437	0.00223543	17.8287	0.142397
Moist Broadleaf Forests	Solimões-Japurá moist forests	0.344934	0.0313972	1.1981	0.0102084	5.47132	0.325139
Moist Broadleaf Forests	Solomon Islands rain forests	0.073767	0.0941915	16.8069	0.0611548	153.263	0.649261
Moist Broadleaf Forests	South China-Vietnam subtropical evergreen forests	0.462286	2.57457	73.3046	1.45533	581.994	0.565271
Moist Broadleaf Forests	South Taiwan monsoon rain forests	0.0053107	0.0470958	116.726	0.0257836	897.552	0.547472
Moist Broadleaf Forests	South Western Ghats moist deciduous forests	0.0489217	0.690738	185.844	0.425261	1607.02	0.615662
Moist Broadleaf Forests	South Western Ghats montane rain forests	0.0465854	0.298273	84.2756	0.386144	1532.38	1.2946
Moist Broadleaf Forests	Southeast Papuan rain forests	0.159178	0.0156986	1.29812	0.00670628	7.78874	0.42719
Moist Broadleaf Forests	Southern Andean Yungas	0.155299	0.0627943	5.32217	0.0766254	91.2161	1.22026
Moist Broadleaf Forests	Southern New Guinea freshwater swamp forests	0.205584	0.0784929	5.0255	0.203424	182.928	2.59162
Moist Broadleaf Forests	Southern New Guinea lowland rain forests	0.25279	0.0156986	0.817408	0.00335314	2.45222	0.213595
Moist Broadleaf Forests	Southern Swahili coastal forests and woodlands	0.308056	0.0156986	0.670762	0.00447085	2.68305	0.284793
Moist Broadleaf Forests	Southwest Amazon moist forests	1.54283	0.769231	6.56262	0.985197	118.052	1.28076
Moist Broadleaf Forests	Southwest Borneo freshwater swamp forests	0.0756335	0.549451	95.6208	0.435554	1064.62	0.792708
Moist Broadleaf Forests	Sri Lanka lowland rain forests	0.0258294	0.188383	95.9986	0.339505	2429.96	1.80221
Moist Broadleaf Forests	Sri Lanka montane rain forests	0.0063347	0.0156986	32.6191	0.00223543	65.2383	0.142397
Moist Broadleaf Forests	Sulawesi lowland rain forests	0.239302	0.0627943	3.45392	0.0410759	31.7329	0.654134
Moist Broadleaf Forests	Sulawesi montane rain forests	0.155949	0.21978	18.55	0.51005	604.642	2.32073
Moist Broadleaf Forests	Sumatran freshwater swamp forests	0.0371827	0.0627943	22.2288	0.0290605	144.488	0.462789
Moist Broadleaf Forests	Sumatran lowland rain forests	0.533707	0.502355	12.3893	0.752309	260.592	1.49757
Moist Broadleaf Forests	Sumatran montane rain forests	0.150052	0.0784929	6.88536	0.204112	251.475	2.60038
Moist Broadleaf Forests	Sumatran peat swamp forests	0.180019	0.266876	19.5132	0.193457	198.671	0.724896
Moist Broadleaf Forests	Sundaland heath forests	0.157465	0.392465	32.8061	0.373495	438.501	0.951666
Moist Broadleaf Forests	Sundarbans freshwater swamp forests	0.0300128	0.298273	130.811	0.0304497	187.562	0.102087
Moist Broadleaf Forests	Taiwan subtropical evergreen forests	0.0688548	1.0675	204.067	0.907134	2435.6	0.849771
Moist Broadleaf Forests	Talamancan montane forests	0.0336283	0.549451	215.061	1.61997	8905.73	2.94834
Moist Broadleaf Forests	Tapajós-Xingu moist forests	0.692424	0.894819	17.0099	2.81179	750.722	3.1423
Moist Broadleaf Forests	Tenasserim-South Thailand semi-evergreen rain forests	0.200288	0.0784929	5.15838	0.0226204	20.8791	0.288184
Moist Broadleaf Forests	Tocantins/Pindare moist forests	0.398317	0.43956	14.5254	0.75726	351.467	1.72277
Moist Broadleaf Forests	Tonle Sap freshwater swamp forests	0.0535709	0.0784929	19.2859	0.178362	615.519	2.27233
Moist Broadleaf Forests	Tonle Sap-Mekong peat swamp forests	0.0604658	0.0313972	6.83469	0.0268251	82.0163	0.854379
Moist Broadleaf Forests	Trinidad and Tobago moist forest	0.00975716	0.502355	677.68	0.0615939	1167.03	0.12261
Moist Broadleaf Forests	Uatumã-Trombetas moist forests	0.971272	0.910518	12.3392	3.68915	702.188	4.0517
Moist Broadleaf Forests	Ucayali moist forests	0.236476	0.172684	9.61177	0.151927	118.772	0.879794
Moist Broadleaf Forests	Upper Gangetic Plains moist deciduous forests	0.542705	0.408163	9.89939	0.230036	78.3611	0.563588
Moist Broadleaf Forests	Vanuatu rain forests	0.0271836	0.32967	159.628	0.00335314	22.8041	0.0101712
Moist Broadleaf Forests	Venezuelan Andes montane forests	0.060479	0.0627943	13.6664	0.0362636	110.85	0.577497
Moist Broadleaf Forests	Veracruz moist forests	0.142466	0.125589	11.6032	0.285664	370.692	2.2746
Moist Broadleaf Forests	Veracruz montane forests	0.0102127	0.0156986	20.2328	0.00167657	30.3492	0.106797
Moist Broadleaf Forests	Western Congolian swamp forests	0.264614	0.0313972	1.56177	0.0657301	45.9219	2.0935
Moist Broadleaf Forests	Western Ecuador moist forests	0.0701606	0.141287	26.5062	0.134405	354.152	0.951288
Moist Broadleaf Forests	Western Guinean lowland forests	0.421996	0.0470958	1.46897	0.222425	97.4414	4.72282
Moist Broadleaf Forests	Western Java montane rain forests	0.0540777	0.0941915	22.9262	0.0562295	192.227	0.59697
Moist Broadleaf Forests	Western Java rain forests	0.0857129	0.125589	19.286	0.20089	433.292	1.59959
Moist Broadleaf Forests	Windward Islands moist forests	0.00416085	0.0313972	99.3223	0.0063337	281.413	0.201728
Moist Broadleaf Forests	Xingu-Tocantins-Araguaia moist forests	0.547725	0.188383	4.52707	0.250719	84.6241	1.3309
Moist Broadleaf Forests	Yucatán moist forests	0.143572	0.423862	38.859	1.21216	1560.84	2.8598
Moist Broadleaf Forests	Yunnan Plateau subtropical evergreen forests	0.495617	0.156986	4.1692	0.0715132	26.6752	0.455539
Montane Grasslands & Shrublands	Central Andean wet puna	0.241499	0.172684	9.41186	0.460291	352.359	2.66551
Montane Grasslands & Shrublands	Cordillera de Merida páramo	0.00578075	0.0313972	71.4898	0.0335314	1072.35	1.06797
Montane Grasslands & Shrublands	East African montane moorlands	0.00638244	0.0941915	194.251	0.0991669	2872.42	1.05282
Montane Grasslands & Shrublands	Ethiopian montane grasslands and woodlands	0.456961	0.141287	4.06969	0.0862874	34.9089	0.610723
Montane Grasslands & Shrublands	Ethiopian montane moorlands	0.0322989	0.0156986	6.3975	0.000272613	1.56037	0.0173654
Montane Grasslands & Shrublands	High Monte	0.240865	0.0156986	0.857877	0.00149028	1.14384	0.0949311
Montane Grasslands & Shrublands	Highveld grasslands	0.499302	0.0156986	0.413843	0.0348726	12.9119	2.22139
Montane Grasslands & Shrublands	Kinabalu montane alpine meadows	0.00123352	0.0470958	502.544	0.0391199	5863.01	0.830647
Montane Grasslands & Shrublands	Madagascar ericoid thickets	0.00263141	0.0470958	235.576	0.262662	18453.5	5.5772
Montane Grasslands & Shrublands	Northern Andean páramo	0.0615981	0.0627943	13.4181	0.0325822	97.787	0.518872
Montane Grasslands & Shrublands	Papuan Central Range sub-alpine grasslands	0.0320337	0.0156986	6.45046	0.0335314	193.514	2.13595
Montane Grasslands & Shrublands	Rwenzori-Virunga montane moorlands	0.00106667	0.251177	3099.48	0.023429	4060.62	0.0932766
Montane Grasslands & Shrublands	Southeast Tibet shrublands and meadows	0.95164	0.0156986	0.217133	0.000372571	0.0723777	0.0237328
